## Infections of the esophagus: an update on risk factors, diagnosis, and management

P. Hoversten <sup>1</sup>, A. K. Kamboj,<sup>1</sup> D. A. Katzka<sup>2</sup>

<sup>1</sup>Department of Internal Medicine and <sup>2</sup>Division of Gastroenterology and Hepatology, Mayo Clinic College of Medicine, Rochester, Minnesota, USA

**SUMMARY.** Infectious esophagitis is a leading cause of esophagitis worldwide. While esophageal infections have traditionally been associated with immunocompromised patients, these disorders are becoming increasingly recognized in immunocompetent individuals. The three most common etiologies of infectious esophagitis are *Candida*, herpes simplex virus, and cytomegalovirus. Human papilloma virus infection can also involve the esophagus in the form of ulcerative lesions and papillomas. Less common etiologies include various other fungal, bacterial, and viral organisms. This review provides a comprehensive update on risk factors, diagnosis, and management of both common and less common infections of the esophagus.

**KEYWORDS:** diagnosis, esophageal, esophagitis, infection, treatment.

### INTRODUCTION

Infectious esophagitis is the third leading cause of esophagitis behind gastroesophageal reflux disease (GERD) and eosinophilic esophagitis (EoE) and can be caused by bacterial, viral, fungal, and parasitic infections.<sup>1</sup> Much of the current research in infectious esophagitis relates to identification of new at-risk populations as well as development of targeted and effective approaches for prevention of infection in certain patient groups. It is of the utmost importance for clinicians to have appropriate suspicion for esophageal infections given the potential morbidity and mortality associated with these diseases, especially in the new generation of transplant recipients and other immunocompromised patient populations. Moreover, there is widespread availability of targeted and effective antimicrobial therapy that can readily be utilized if a prompt diagnosis is made. This article will serve to demonstrate the changing landscape of at-risk

patient populations and review the latest recommendations for methods of diagnosis and considerations for selection of treatment approaches.

The most common cause of infectious esophagitis is *Candida* followed by herpes simplex virus (HSV) and cytomegalovirus (CMV).<sup>2</sup> Less common entities include human immunodeficiency virus (HIV),<sup>3</sup> tuberculosis,<sup>4</sup> varicella zoster virus (VZV),<sup>5</sup> human papilloma virus (HPV),<sup>6</sup> and various bacterial and parasitic organisms.<sup>7</sup> While infectious esophagitis most commonly occurs in immunocompromised patients, especially those with HIV/AIDS, diabetes, and those on immunosuppressive medications, it can also affect immunocompetent individuals.<sup>8</sup>

### *Candida* esophagitis

Esophageal candidiasis (EC) is the most common cause of infectious esophagitis. Of all *Candida* species, *Candida albicans* is the most common organism implicated in both colonization and infection.<sup>7,9</sup> Determination of specific *Candida* species can be clinically significant as *glabrata* species are more likely to have azole-resistance, which changes decision making in pharmacotherapy.<sup>10</sup> In addition, the use of prolonged antifungal therapy increases the rate of drug-resistant *C. albicans* species in the gastrointestinal tract and creates opportunities for non-*Candida* fungal colonizers to proliferate.<sup>11–13</sup>

Address correspondence to: David A. Katzka, MD, Division of Gastroenterology and Hepatology, Mayo Clinic 200 First St. S.W. Rochester, MN 55905, USA. Email: [katzka.david@mayo.edu](mailto:katzka.david@mayo.edu)  
Specific author contributions: Concept: Patrick Hoversten, Amrit K. Kamboj, David A. Katzka; Literature review: Patrick Hoversten, Amrit K. Kamboj; Drafting of manuscript: Patrick Hoversten, Amrit K. Kamboj; Drafting: David A. Katzka; Critical review of manuscript: David A. Katzka.

Esophageal candidiasis has strong clinical significance with regard to patient mortality. In fact, one case-control study evaluating patients with EC 65 years of age or older found that patients with EC had a 6-month mortality rate of 47% compared to 5% in controls, and a 1-year survival of 38% compared to 93% in controls.<sup>14</sup> This finding was independent of the level of patient disability, suggesting that candida may be an independent risk factor as opposed to simply a marker of severe underlying medical comorbidities.

From an epidemiological standpoint, a recent large population based study from Japan evaluated the prevalence of EC among a cohort of 80,219 patients who underwent upper endoscopy between 2002 and 2014. The prevalence of EC was 1.7% in all patients, 9.8% in HIV patients, and 1.6% in non-HIV patients.<sup>15</sup> Other recent studies have demonstrated an overall decrease in the prevalence of EC in AIDS patients following the advent of highly active antiretroviral therapy (HAART).<sup>16–18</sup>

AIDS is the most commonly associated risk factor with development of EC, and AIDS patients with EC have lower CD4 counts than AIDS patients with limited oropharyngeal involvement.<sup>19</sup> However, there have been multiple recent studies aimed at identifying significant risk factors for development of EC in the non-HIV patient population where the prevalence of disease is increasing.<sup>17</sup> A summary of recent larger studies identifying these risk factors can be found in Table 1. Common risk factors identified include antibiotics, proton pump inhibitors (PPIs), H2 blockers,<sup>20,21</sup> alcohol, malignancy, topical and systemic corticosteroids,<sup>22</sup> and motility disorders, although the association of these risk factors is somewhat inconsistently demonstrated between studies.<sup>14,15,23–27</sup> Risk factors with the most consistent association between studies are antibiotics, corticosteroids, and malignancy. Medications can predispose patients to EC by altering the microenvironment of the esophageal mucosa and making it more favorable for candidal growth.<sup>14,15,24–26</sup> PPI and H2 blockers can result in hypochlorhydria, facilitating *Candida* colonization and infection of the esophageal mucosa.<sup>25,21</sup> Esophageal candidiasis is rarely present in patients without HIV or identifiable risk factors.<sup>28</sup>

A diagnosis of EC is made using a combination of characteristic endoscopic and histopathologic findings. Endoscopically, the esophageal mucosa displays thick, white plaques. Histopathology from biopsy or smear from brushings reveals budding yeast and pseudohyphae or hyphae with invasion of the epithelium (Fig. 1A).<sup>29</sup> While endoscopy is diagnostically necessary in the majority of EC cases, it may not be required in certain patient populations. One study evaluated 22 patients with known malignancy and oral candidiasis noted on physical exam. Of these 22 patients, 21 (95.5%) had endoscopic evidence of EC, suggesting

routine endoscopy for this particular patient population may not always be necessary for diagnosis of EC.<sup>30</sup> The severity of esophagitis seen on endoscopy and classification using the Kodsi scoring system may be helpful in predicting the degree of gastrointestinal symptoms. Endoscopically, severe disease is found more often in patients with HIV infection. In contrast, patients with asymptomatic EC have endoscopic findings ranging from mild to severe esophagitis.<sup>31</sup>

Current guidelines recommend that EC in immunocompromised patients be treated with systemic anti-fungal therapy as opposed to local agents that are frequently used for oropharyngeal disease. Fluconazole is the mainstay of treatment.<sup>32</sup> Several randomized trials comparing fluconazole to other azole treatment regimens for EC were performed on severely immunocompromised patient populations including HIV-infected patients. A summary of these studies can be found in Table 2. Empiric fluconazole appears to be the most cost-effective strategy for management of HIV patients with esophageal symptoms when taking into consideration medication and procedure-related costs.<sup>3</sup> Echinocandins, amphotericin, and nonfluconazole azoles like posaconazole may be considered in patients refractory to fluconazole.<sup>33–35</sup>

There is limited literature to guide treatment of EC in non-HIV-infected patient populations. In fact, some recent studies suggest that not all patients with EC require treatment.<sup>36,37</sup> One study evaluated 142 immunocompetent patients with biopsy-proven EC who were asymptomatic and found no correlation between treatment with anti-fungal agents and endoscopic remission of EC on follow-up endoscopy.<sup>36</sup> These data suggest that antifungal treatment may not be necessary in the asymptomatic, immunocompetent EC patient population. In another recent study, Lee *et al.* retrospectively identified 79 patients with asymptomatic EC and described the natural history of the clinical course.<sup>37</sup> Of these 79 patients, 64 (81.0%) had resolved on repeat endoscopy and only 15 had recurrent EC on repeat endoscopy. In 10 of these 15 patients where EC persisted, none developed esophageal symptoms or had endoscopically worsening disease suggesting that asymptomatic EC could be a self-resolving disease in the majority of cases and even when it persists endoscopically, it is of little to no clinical significance.

### Herpes simplex virus esophagitis

Much of the world's adult population is HSV seropositive, but often the virus remains latent and is not pathogenic. Primary infection or reactivation of latent virus can, however, result in clinically significant disease. HSV-1 causes herpes simplex esophagitis (HSE) far more commonly than HSV-2 in adults.<sup>42</sup>

**Table 1.** Summary to studies highlighting significant risk factors for development of EC.

| Study                                   | N (HIV/non-HIV) | PPIs  | Antibiotics | Steroids | Diabetes | Cancer | Heavy alcohol use |
|-----------------------------------------|-----------------|-------|-------------|----------|----------|--------|-------------------|
| Takahashi <i>et al.</i> <sup>15</sup>   | 211 (163/48)    | Red   | Gray        | Green    | Red      | Gray   | Red               |
| Martinez <i>et al.</i> <sup>25</sup>    | 51 (51/0)       | Green | Green       | Green    | Gray     | Green  | Gray              |
| Weerasuriya <i>et al.</i> <sup>14</sup> | 56 (unknown)    | Gray  | Green       | Gray     | Red      | Green  | Gray              |
| Yokoob <i>et al.</i> <sup>26</sup>      | 51 (51/0)       | Gray  | Green       | Green    | Gray     | Green  | Gray              |
| Choi <i>et al.</i> <sup>27</sup>        | 281 (281/0)     | Red   | Green       | Green    | Gray     | Gray   | Green             |

Green, significant risk factor for EC; red, not significant risk factor for EC; gray, not assessed.

There are several known risk factors for the development of HSE, including hematologic malignancy, solid tumors, extensive burns, autoimmune disease, and HIV infection.<sup>43</sup> Interestingly, with increasing recognition of EoE, there is new data suggesting that HSE may be associated with EoE, especially in the pediatric patient population.<sup>44–48</sup> A recent study that performed a retrospective analysis of 16 pediatric patients with HSE from a single center found that 11 of the 16 were immunocompetent patients with 5 (45%) having biopsy-proven EoE following resolution of HSE. This suggests that clinical and endoscopic follow-up for EoE may be warranted in some children who develop HSE.<sup>45</sup> Similarly, a case series of three children with HSE found that they later developed EoE.<sup>46</sup> Given that the prevalence of HSE in immunocompetent children is rare and that EoE is relatively uncommon, there may be an association between these entities. Several case reports and series describe a similar association.<sup>49–51</sup> In a case series with five immunocompetent patients, four were found to have active EoE at the time of the HSE diagnosis.<sup>50</sup> Additional research is needed to further clarify the relationship between these two esophageal pathologies.

The diagnosis of HSV esophagitis is also made based using endoscopy and histopathology. The characteristic endoscopic appearance of HSV esophagitis includes multiple small, punched-out ulcers with or without raised margins, and fibrin exudate. Histological findings include multinucleated giant cells with nuclear molding and nuclear chromatin with ground glass appearance or Cowdry A inclusion bodies.<sup>52,53</sup> In the largest single center case series of HSE, 47 patients with HSE were identified. Thirty-five (74.5%) of the 47 patients had HSV ulcers located in the middle to lower one-third of the esophagus, and only 4.3% had ulcers isolated to the upper one third of the esophagus.<sup>54</sup> Immunocompromised hosts with HSE should receive treatment with acyclovir, famciclovir, or valacyclovir. There is less evidence for treatment regimens for immunocompetent patient populations. Herpes simplex esophagitis is usually a self-resolving infection in immunocompetent adults with a natural history typically lasting 1 to 2 weeks. There are, however, case reports of treatment with acyclovir leading to a rapid symptomatic response in immunocompetent patients,

suggesting that treatment with acyclovir may be beneficial even in immunocompetent patients.<sup>42</sup>

### Cytomegalovirus esophagitis

Gastrointestinal CMV disease most frequently occurs in immunocompromised individuals such as those with AIDS, organ transplantation, long-term dialysis, and those on chemotherapy, corticosteroids, or immunosuppressive medications; however CMV esophagitis occurring in immunocompetent patients has been reported.<sup>55–61</sup> The most common gastrointestinal manifestations of CMV infection are colitis and esophagitis, respectively.<sup>61</sup>

The diagnosis of CMV esophagitis is made using a combination of clinical history, endoscopic findings, and histologic features. Cytomegalovirus esophagitis classically presents with odynophagia.<sup>62</sup> Other presenting symptoms include fever, nausea, emesis, dysphagia, epigastric pain, substernal chest pain, and gastrointestinal bleeding.<sup>59,61–63</sup> Systemic symptoms are common as more than one organ system may be involved. In general, the symptoms of CMV esophagitis tend to be more gradual than HSE.<sup>7</sup>

The endoscopic appearance of CMV esophagitis is variable. The majority of patients present with multiple ulcers located in the middle to distal esophagus.<sup>62</sup> Cytomegalovirus esophageal ulcers are typically either shallow or of intermediate depth with only a minority having deep depth or heaped up appearance.<sup>62</sup> The ulcers tend to be linear and discrete with normal intervening mucosa.<sup>62,64</sup> The size distribution of ulcers is variable with 43% less than 1 cm in size, 29% between 1 and 2 cm, and 28% greater than 2 cm in size.<sup>62</sup> Rarely, CMV esophagitis can be diffusely erosive and mimic HSV and reflux esophagitis.<sup>62</sup> Additionally, CMV esophagitis has also been associated with tissue necrosis and strictures.<sup>65,66</sup> There is significant overlap in the endoscopic findings between CMV and HSV esophagitis and histopathology may be required to differentiate these entities. In some patients, coinfection with CMV and HSV infection may be present.<sup>67</sup>

Histopathology in CMV esophagitis demonstrates inflammation and nuclear and cytoplasmic inclusions.<sup>68</sup> Cytomegalic cells are also known as owl's eye cells because of their characteristic appearance

| Type of Infection   | Pathologic Findings                                                                                                                                                                                                                            |
|---------------------|------------------------------------------------------------------------------------------------------------------------------------------------------------------------------------------------------------------------------------------------|
| Candida Esophagitis | 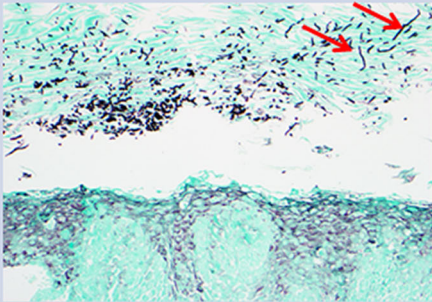 <p data-bbox="624 552 1171 604">A) GMS stain demonstrating numerous yeast forms including pseudohyphae (arrows) consistent with <i>Candida</i> species.</p> |
| HSV Esophagitis     |  <p data-bbox="624 936 1171 989">B) HSV1/2 immunohistochemical stain demonstrating nuclear and granular cytoplasmic positivity in infected cells.</p>        |
| CMV Esophagitis     |  <p data-bbox="624 1320 1118 1373">C) CMV immunohistochemical stain demonstrating intranuclear and cytoplasmic positivity in infected cells.</p>           |

**Figure 1.** Histopathologic findings of Candida (A), HSV (B), and CMV (C) esophagitis.

of a basophilic intranuclear inclusion surrounded by a clear halo (owl's eyes) and intracytoplasmic inclusions.<sup>55,69</sup> The presence of owl's eye inclusion bodies is highly specific, albeit not sensitive, for the detection of CMV organ involvement.<sup>70</sup> Histologic evidence of CMV infection is common in patients with risk factors and suspicious lesions, although this is highly dependent on the number of biopsies taken and the diligence of pathologist.<sup>55</sup> Viral cultures and cytological brushings have little clinical benefit for diagnosis over multiple biopsy specimens with histology.<sup>71</sup>

In patients at high risk of developing CMV esophagitis (CD4 count < 50) who have severe clinical symptoms, treatment should be initiated

while awaiting pathological confirmation. Treatment consists of induction therapy with or without maintenance therapy. Induction therapy consists of a 3- to 6-week course of ganciclovir or foscarnet.<sup>72,73</sup> While both antiviral agents have similar efficacy and are acceptable first-line agents,<sup>74,75</sup> ganciclovir is preferred due to cost and renal side effects associated with foscarnet. However, foscarnet is the preferred agent for patients with contraindications to ganciclovir such as moderate to severe thrombocytopenia or ganciclovir resistance.<sup>68</sup> Intravenous induction therapy is preferred for patients with severe clinical symptoms and inability to tolerate oral intake.<sup>68</sup> In patients with mild symptoms and no difficulty with oral intake,



involves voriconazole and in refractory cases, amphotericin B.<sup>92</sup>

*Histoplasma capsulatum* is classically found in the Midwestern United States.<sup>93</sup> Histoplasmosis primarily manifests as a pulmonary infection and the disease activity depends on a host's immune system and the number of conidia inhaled.<sup>93</sup> In most healthy individuals, the disease causes mild to no symptoms; however, in immunocompromised hosts, disseminated disease can occur, which can potentially be life-threatening.<sup>93</sup> While primary esophageal involvement is rare, esophageal ulceration can occur with disseminated disease and esophageal narrowing can result from mediastinal lymph node involvement and compression.<sup>94,95</sup> Treatment depends on the severity of the disease with itraconazole as the drug of choice for mild to moderate disease and amphotericin B for severe disease.<sup>93</sup>

Bacterial esophagitis can occur due to organisms that constitute the normal oropharyngeal flora. This includes gram positive, gram-negative, and anaerobic organisms. The most frequent bacterial inhabitant of the esophagus is *Streptococcus* species.<sup>96</sup> However, in patients with longstanding reflux, inflammation can result in alterations to the normal microbiome, with an increase in gram-negative anaerobes.<sup>97</sup> Most commonly, bacterial esophagitis occurs in immunocompromised hosts with malignancy and neutropenia although case reports exist describing it in immunocompetent individuals.<sup>98–100</sup> Patients with bacterial esophagitis should be initiated on broad-spectrum antibiotics and narrowing of antibiotics should be guided by culture results. *Mycobacterial tuberculosis* can result in esophageal tuberculosis, particularly in patients with dysphagia from developing countries and immunocompromised status.<sup>101–103</sup> Esophageal involvement may manifest as a tracheoesophageal fistula, nodal invasion, or ulceration. Patients with esophageal tuberculosis respond well to standard anti-tuberculosis treatment.<sup>101</sup> *Mycobacterium avium complex* esophagitis has also been described and requires treatment with multiple antimycobacterial agents for several months.<sup>104</sup>

Causes of viral esophagitis other than HPV include HIV, VZV, and Epstein-Barr virus (EBV).<sup>105</sup> Primary HIV ulceration is typically seen in patients with uncontrolled HIV and has become less common with the use of HAART. HIV-related esophagitis may develop during acute HIV seroconversion syndrome or in AIDS.<sup>106</sup> In a patient with HIV presenting with new esophageal symptoms, management often begins with a trial of systemic antifungal therapy. HIV-associated idiopathic esophageal ulcers should be considered in the differential if patients do not respond to antifungals or antivirals or without a more common cause identified on biopsy. Varicella

zoster virus esophagitis is rare and should be suspected in ill patients with dermatological manifestations of the disease with pruritic vesicular lesions.<sup>7</sup> Patients may present with dysphagia secondary to multiple cranial nerve involvement or esophagitis due to esophagobronchial fistula.<sup>107–109</sup> Endoscopy may reveal vesicles and ulcers and biopsies may demonstrate multinucleated giant cells.<sup>7,109</sup> Treatment with acyclovir, valacyclovir, or famciclovir should be instituted within 72 hours for patients with or at-risk of complications from herpes zoster.<sup>110</sup> Epstein-Barr virus is the causative agent of infectious mononucleosis and can also cause esophagitis. Epstein-Barr virus has previously been associated with esophageal ulcerations in patients with AIDS.<sup>111</sup> Symptomatic EBV esophageal disease may require treatment with acyclovir.<sup>7</sup>

## CONCLUSION

Esophagitis is a common condition worldwide, with reflux being the most common etiology. However, infectious esophagitis is important to recognize as early diagnosis is essential to guide appropriate management. Recent literature has identified new risk factors for development of infective esophagitis, especially in regards to candida esophagitis. A current and comprehensive understanding of persons at risk of the various forms of infectious esophagitis is important to correctly diagnose and treat them.

## ACKNOWLEDGEMENTS

Tsung-Teh Wu, M.D., Ph.D. and Daniel Larson, Department of Pathology, Mayo Clinic Rochester, Minnesota.

## References

1. Wilcox C M. Overview of infectious esophagitis. *Gastroenterol Hepatol (N Y)* 2013; 9: 517–9.
2. Wilcox C M, Karowe M W. Esophageal infections: etiology, diagnosis, and management. *Gastroenterologist* 1994; 2: 188–206.
3. Rabeneck L, Boyko W J, McLean D M, McLeod W A, Wong K K. Unusual esophageal ulcers containing enveloped virus-like particles in homosexual men. *Gastroenterology* 1986; 90: 1882–9.
4. Marshall J B. Tuberculosis of the gastrointestinal tract and peritoneum. *Am J Gastroenterol* 1993; 88: 989–99.
5. Gill R A, Gebhard R L, Dozeman R L, Sumner H W. Shingles esophagitis: endoscopic diagnosis in two patients. *Gastrointest Endosc* 1984; 30: 26–27.
6. Winkler B, Capo V, Reumann W *et al*. Human papillomavirus infection of the esophagus. A clinicopathologic study with demonstration of papillomavirus antigen by the immunoperoxidase technique. *Cancer* 1985; 55: 149–55.

7. Baehr P H, McDonald G B. Esophageal infections: risk factors, presentation, diagnosis, and treatment. *Gastroenterology* 1994; 106: 509–32.
8. Hoversten P, Otaki F, Katzka D A. Course of esophageal candidiasis and outcomes of patients at a single center. *Clin Gastroenterol Hepatol* 2018. doi:10.1016/j.cgh.2018.04.035
9. McDonald G B, Sharma P, Hackman R C, Meyers J D, Thomas E D. Esophageal infections in immunosuppressed patients after marrow transplantation. *Gastroenterology* 1985; 88: 1111–7.
10. Wilson A, Delpont J, Ponich T. *Candida glabrata* esophagitis: are we seeing the emergence of a new azole-resistant pathogen? *Int J Microbiol* 2014; 2014: 1–4.
11. Bluhm C S, Bickerstaff C A, Holt S. Refractory esophageal candidiasis in acquired immune deficiency syndrome (AIDS). *Am J Gastroenterol* 1990; 85: 479–80.
12. Kitchen V S, Savage M, Harris J R. *Candida albicans* resistance in AIDS. *J Infect* 1991; 22: 204–5.
13. Tavitian A, Raufman J P, Rosenthal L E, Weber J, Webber C A, Dincsoy H P. Ketoconazole-resistant *Candida* esophagitis in patients with acquired immunodeficiency syndrome. *Gastroenterology* 1986; 90: 443–5.
14. Weerasuriya N, Snape J. A study of candida esophagitis in elderly patients attending a district general hospital in the UK. *Dis Esophagus* 2006; 19: 189–92.
15. Takahashi Y, Nagata N, Shimbo T *et al.* Long-term trends in esophageal candidiasis prevalence and associated risk factors with or without HIV infection: lessons from an endoscopic study of 80,219 patients. *PLoS One* 2015; 10: e0133589.
16. Mcroft A, Oancea C, van Lunzen J *et al.* Decline in esophageal candidiasis and use of antimycotics in European patients with HIV. *Am J Gastroenterol* 2005; 100: 1446–54.
17. Alsomali M I, Arnold M A, Frankel W L *et al.* Challenges to “Classic” esophageal candidiasis. *Am J Clin Pathol* 2017; 147: 33–42.
18. Raufman J-P. Declining gastrointestinal opportunistic infections in HIV-infected persons: a triumph of science and a challenge for our HAARTs and minds. *Am J Gastroenterol* 2005; 100: 1455–8.
19. López-Dupla M, Mora S P, Pintado G V *et al.* Clinical, endoscopic, immunologic, and therapeutic aspects of oropharyngeal and esophageal candidiasis in HIV-infected patients: a survey of 114 cases. *Am J Gastroenterol* 1992; 87: 1771–6.
20. Kochhar R, Talwar P, Singh S, Mehta S K. Invasive candidiasis following cimetidine therapy. *Am J Gastroenterol* 1988; 83: 102–3.
21. Vermeersch B, Rysselaere M, Dekeyser K *et al.* Fungal colonization of the esophagus. *Am J Gastroenterol* 1989; 84: 1079–83.
22. Mullaoglu S, Turktas H, Kocurk N, Tuncer C, Kalkanci A, Kustimur S. Esophageal candidiasis and *Candida* colonization in asthma patients on inhaled steroids. *Allergy Asthma Proc* 2007; 28: 544–9.
23. Underwood J A, Williams J W, Keate R F. Clinical findings and risk factors for *Candida* esophagitis in outpatients. *Dis Esophagus* 2003; 16: 66–69.
24. Gundry S R, Borkon A M, McIntosh C L, Morrow A G. *Candida* esophagitis following cardiac operation and short-term antibiotic prophylaxis. *J Thorac Cardiovasc Surg* 1980; 80: 661–8.
25. Chocarro M A, Galindo T F, Ruiz-Iratorza G *et al.* Risk factors for esophageal candidiasis. *Eur J Clin Microbiol Infect Dis* 2000; 19: 96–100.
26. Yakoob J, Jafri W, Abid S *et al.* *Candida* esophagitis: risk factors in non-HIV population in Pakistan. *World J Gastroenterol* 2003; 9: 2328–31.
27. Choi J H, Lee C G, Lim Y J, Kang H W, Lim C Y, Choi J-S. Prevalence and risk factors of esophageal candidiasis in healthy individuals: a single center experience in Korea. *Yonsei Med J* 2013; 54: 160–5.
28. Mimidis K, Papadopoulos V, Margaritis V *et al.* Predisposing factors and clinical symptoms in HIV-negative patients with *Candida* oesophagitis: are they always present? *Int J Clin Pract* 2004; 59: 210–3.
29. Kodsí B E, Wickremesinghe C, Kozinn P J, Iswara K, Goldberg P K. *Candida* esophagitis: a prospective study of 27 cases. *Gastroenterology* 1976; 71: 715–9.
30. Samonis G, Skordilis P, Maraki S *et al.* Oropharyngeal candidiasis as a marker for esophageal candidiasis in patients with cancer. *Clin Infect Dis* 1998; 27: 283–6.
31. Asayama N, Nagata N, Shimbo T *et al.* Relationship between clinical factors and severity of esophageal candidiasis according to Kodsí’s classification. *Dis Esophagus* 2014; 27: 214–9.
32. Pappas P G, Kauffman C A, Andes D R *et al.* Clinical practice guideline for the management of candidiasis: 2016 update by the infectious diseases society of America. *Clin Infect Dis* 2016; 62: e1–50.
33. Vazquez J A, Skiest D J, Nieto L *et al.* A multicenter randomized trial evaluating posaconazole versus fluconazole for the treatment of oropharyngeal candidiasis in subjects with HIV/AIDS. *Clin Infect Dis* 2006; 42: 1179–86.
34. Skiest D J, Vazquez J A, Anstead G M *et al.* Posaconazole for the treatment of azole-refractory oropharyngeal and esophageal candidiasis in subjects with HIV infection. *Clin Infect Dis* 2007; 44: 607–14.
35. Barbaro G, Barbarini G, Di Lorenzo G. Fluconazole vs. flucytosine in the treatment of esophageal candidiasis in AIDS patients: a double-blind, placebo-controlled study. *Endoscopy* 1995; 27: 377–83.
36. Min Y W, Kim E, Son H J, Kim J J, Rhee P-L. Antifungal treatment is not required for immunocompetent individuals with asymptomatic esophageal candidiasis. *Medicine (Baltimore)* 2015; 94: e1969.
37. Lee S P, Sung I K, Kim J H, Lee S Y, Park H S, Shim C S. The clinical course of asymptomatic esophageal candidiasis incidentally diagnosed in general health inspection. *Scand J Gastroenterol* 2015; 50: 1444–50.
38. Laine L, Dretler R H, Contas C N *et al.* Fluconazole compared with ketoconazole for the treatment of candida esophagitis in AIDS. *Ann Intern Med* 1992; 117: 655–60.
39. Wilcox C M, Darouiche R O, Laine L, Moskovitz B L, Mallegol I, Wu J. A randomized, double-blind comparison of itraconazole oral solution and fluconazole tablets in the treatment of esophageal candidiasis. *J Infect Dis* 1997; 176: 227–32.
40. Barbaro G, Barbarini G, Calderon W, Grisorio B, Alcini P, Di Lorenzo G. Fluconazole versus itraconazole for candida esophagitis in acquired immunodeficiency syndrome. *Candida Esophagitis*. *Gastroenterology* 1996; 111: 1169–77.
41. Ally R, Schürmann D, Kreisel W *et al.* A randomized, double-blind, double-dummy, multicenter trial of voriconazole and fluconazole in the treatment of esophageal candidiasis in immunocompromised patients. *Clin Infect Dis* 2001; 33: 1447–54.
42. Kadayakkara D K, Candelaria A, Kwak Y E, Loeser C. Herpes simplex virus-2 esophagitis in a young immunocompetent adult. *Case Rep Gastrointest Med*. 2016; 2016: 1–3.
43. Généreau T, Rozenberg F, Bouchaud O, Marche C, Lortholary O. Herpes esophagitis: a comprehensive review. *Clin Microbiol Infect* 1997; 3: 397–407.
44. Žaja F O, Lesar T, Busić N, Tešović G. Herpes simplex primo-infection in an immunocompetent host with eosinophilic esophagitis. *Pediatr Int* 2013; 55: e38–41.
45. Fritz J, Lerner D, Suchi M. Herpes simplex virus esophagitis in immunocompetent children. *J Pediatr Gastroenterol Nutr* 2018; 66: 609–13.
46. Squires K A, Cameron D J, Oliver M, da Fonseca Junqueira J C. Herpes simplex and eosinophilic oesophagitis: the chicken or the egg? *J Pediatr Gastroenterol Nutr* 2009; 49: 246–50.
47. Monsanto P, Almeida N, Cipriano M A, Gouveia H, Sofia C. Concomitant herpetic and eosinophilic esophagitis—a causality dilemma. *Acta Gastroenterol Belg* 2012; 75: 361–3.
48. Sehgal S, Darbari A, Bader A. Herpes simplex virus and eosinophilic esophagitis. *J Pediatr Gastroenterol Nutr* 2013; 56: e1.
49. Lindberg G M, Van Eldik R, Saboorian M H. A case of herpes esophagitis after fluticasone propionate for eosinophilic esophagitis. *Nat Rev Gastroenterol Hepatol* 2008; 5: 527–30.
50. Zimmermann D, Cribblez D H, Dellon E S *et al.* Acute herpes simplex viral esophagitis occurring in 5 immunocompetent

- individuals with eosinophilic esophagitis. *ACGCR* 2016; 3: 165–8.
51. Machicado J D, Younes M, Wolf D S. An unusual cause of odynophagia in a patient with eosinophilic esophagitis. *Gastroenterology* 2014; 147: 37–38.
  52. Wong R C K, Abdul-Karim F W. Atypical herpes simplex esophagitis. *Gastrointest Endosc* 2005; 61: 291–2.
  53. McBane R D, Gross J B. Herpes esophagitis: clinical syndrome, endoscopic appearance, and diagnosis in 23 patients. *Gastrointest Endosc* 1991; 37: 600–3.
  54. Wang H-W, Kuo C-J, Lin W-R *et al*. Clinical characteristics and manifestation of herpes esophagitis. *Medicine (Baltimore)* 2016; 95: e3187.
  55. Goodgame R W, Genta R M, Estrada R, Demmler G, Bufone G. Frequency of positive tests for cytomegalovirus in AIDS patients: endoscopic lesions compared with normal mucosa. *Am J Gastroenterol* 1993; 88: 338–43.
  56. Weile J, Streeck B, Muck J *et al*. Severe cytomegalovirus-associated esophagitis in an immunocompetent patient after short-term steroid therapy. *J Clin Microbiol* 2009; 47: 3031–3.
  57. Galiatsatos P, Shrier I, Lamoureux E, Szilagyi A. Meta-analysis of outcome of cytomegalovirus colitis in immunocompetent hosts. *Dig Dis Sci* 2005; 50: 609–16.
  58. Umemoto K, Kojima Y, Nagata N *et al*. Cytomegalovirus esophagitis developing during chemoradiotherapy for esophageal cancer: two case reports. *J Med Case Reports* 2016; 10: 259.
  59. Marques S, Carmo J, Pinto D, Bispo M, Ramos S, Chagas C. Cytomegalovirus disease of the upper gastrointestinal tract: a 10-year retrospective study. *GE Port J Gastroenterol* 2017; 24: 262–8.
  60. Ozaki T, Yamashita H, Kaneko S *et al*. Cytomegalovirus disease of the upper gastrointestinal tract in patients with rheumatic diseases: a case series and literature review. *Clin Rheumatol* 2013; 32: 1683–90.
  61. Wang H W, Kuo C J, Lin W R *et al*. The clinical characteristics and manifestations of cytomegalovirus esophagitis. *Dis Esophagus* 2016; 29: 392–9.
  62. Wilcox C M, Straub R F, Schwartz D A. Prospective endoscopic characterization of cytomegalovirus esophagitis in AIDS. *Gastrointest Endosc* 1994; 40: 481–4.
  63. Kanda K, Kume K, Yoshikawa I *et al*. Cytomegalovirus esophagitis with massive upper-GI hemorrhage. *Gastrointest Endosc* 2004; 59: 741–3.
  64. Rosołowski M, Kierzkiewicz M. Etiology, diagnosis and treatment of infectious esophagitis. *Prz Gastroenterol* 2013; 8: 333–7.
  65. Barjas E, Pires S, Lopes J *et al*. Cytomegalovirus acute necrotizing esophagitis. *Endoscopy* 2001; 33: 735.
  66. Olmos M, Sanchez Basso A, Battaglia M, Concetti H, Magnanini F. Esophageal strictures complicating cytomegalovirus ulcers in patients with AIDS. *Endoscopy* 2001; 33: 822.
  67. Albuquerque A, Cardoso H, Ribeiro A *et al*. Herpes and cytomegalovirus esophagitis. *Endoscopy* 2012; 44:E242–3.
  68. Whitley R J, Jacobson M A, Friedberg D N *et al*. Guidelines for the treatment of cytomegalovirus diseases in patients with AIDS in the era of potent antiretroviral therapy: recommendations of an international panel. *International AIDS Society-USA. Arch Intern Med* 1998; 158: 957–69.
  69. Herriot R, Gray E S. Images in clinical medicine. Owl's-eye cells. *N Engl J Med* 1994; 331: 649.
  70. Mattes F M, McLaughlin J E, Emery V C, Clark D A, Griyths P D. Histopathological detection of owl's eye inclusions is still specific for cytomegalovirus in the era of human herpesviruses 6 and 7. *J Clin Pathol* 2000; 53: 612–4.
  71. Wilcox C M, Rodgers W, Lazenby A. Prospective comparison of brush cytology, viral culture, and histology for the diagnosis of ulcerative esophagitis in AIDS. *Clin Gastroenterol Hepatol* 2004; 2: 564–7.
  72. Dieterich D T, Kotler D P, Busch D F *et al*. Ganciclovir treatment of cytomegalovirus colitis in AIDS: a randomized, double-blind, placebo-controlled multicenter study. *J Infect Dis* 1993; 167: 278–82.
  73. Nelson M R, Connolly G M, Hawkins D A, Gazzard B G. Foscarnet in the treatment of cytomegalovirus infection of the esophagus and colon in patients with the acquired immune deficiency syndrome. *Am J Gastroenterol* 1991; 86: 876–81.
  74. Blanshard C, Benhamou Y, Dohin E, Lernestedt J O, Gazzard B G, Katlama C. Treatment of AIDS-associated gastrointestinal cytomegalovirus infection with foscarnet and ganciclovir: a randomized comparison. *J Infect Dis* 1995; 172: 622–8.
  75. Parente F, Bianchi Porro G. Treatment of cytomegalovirus esophagitis in patients with acquired immune deficiency syndrome: a randomized controlled study of foscarnet versus ganciclovir. *Am J Gastroenterol* 1998; 93: 317–22.
  76. Dieterich D T, Poles M A, Lew E A *et al*. Concurrent use of ganciclovir and foscarnet to treat cytomegalovirus infection in AIDS patients. *J Infect Dis* 1993; 167: 1184–8.
  77. Salzberger B, Hartmann P, Hanses F *et al*. Incidence and prognosis of CMV disease in HIV-infected patients before and after introduction of combination antiretroviral therapy. *Infection* 2005; 33: 345–9.
  78. Mel Wilcox C, Straub R F, Schwartz D A. Cytomegalovirus esophagitis in AIDS: a prospective evaluation of clinical response to ganciclovir therapy, relapse rate, and long-term outcome. *Am J Med* 1995; 98: 169–76.
  79. Muñoz N, Bosch F X, de Sanjosé S *et al*. Epidemiologic classification of human papillomavirus types associated with cervical cancer. *N Engl J Med* 2003; 348: 518–27.
  80. Bohn OL, Navarro L, Saldivar J, Sanchez-Sosa S. Identification of human papillomavirus in esophageal squamous papillomas. *World J Gastroenterol* 2008; 14: 7107.
  81. Quarto G, Sivero L, Somma P *et al*. A case of infectious esophagitis caused by human papilloma virus. *Minerva Gastroenterol Dietol* 2008; 54: 317–21.
  82. Lavergne D, de Villiers E-M. Papillomavirus in esophageal papillomas and carcinomas. *Int J Cancer* 1999; 80: 681–4.
  83. Lee K, Lee O, Lee S. Gastrointestinal: diffuse esophageal papillomatosis involving the entire esophagus. *J Gastroenterol Hepatol* 2014; 29: 1951.
  84. Gençdal G, Degirmencioglu S, Akyıldız M. Diffuse esophageal squamous papillomatosis covering the entire esophagus. *Clin Gastroenterol Hepatol* 2018; 16: A28.
  85. McDonald N M, Amateau S K. Treatment of diffuse esophageal squamous papillomatosis with cryotherapy. *Am J Gastroenterol* 2016; 111: 1378.
  86. Li X, Gao C, Yang Y *et al*. Systematic review with meta-analysis: the association between human papillomavirus infection and oesophageal cancer. *Aliment Pharmacol Ther* 2014; 39: 270–81.
  87. Petrick J L, Wyss A B, Butler A M *et al*. Prevalence of human papillomavirus among oesophageal squamous cell carcinoma cases: systematic review and meta-analysis. *Br J Cancer* 2014; 110: 2369–77.
  88. Bohn O-L, Navarro L, Saldivar J, Sanchez-Sosa S. Identification of human papillomavirus in esophageal squamous papillomas. *World J Gastroenterol* 2008; 14: 7107–11.
  89. d'Huart M-C, Chevaux J, Bressenot A *et al*. Prevalence of esophageal squamous papilloma (ESP) and associated cancer in northeastern France. *Endosc Int Open* 2015; 3: E101–6.
  90. Segal B H. Aspergillosis. *N Engl J Med* 2009; 360: 1870–84.
  91. Bergman S, Geisinger KR. Esophageal aspergillosis in cytologic brushings: report of two cases associated with acute myelogenous leukemia. *Diagn Cytopathol* 2004; 30: 347–9.
  92. Herbrecht R, Denning D W, Patterson T F *et al*. Voriconazole versus amphotericin B for primary therapy of invasive aspergillosis. *N Engl J Med*. 2002; 347: 408–15.
  93. Kauffman C A. Histoplasmosis: a clinical and laboratory update. *Clin Microbiol Rev* 2007; 20: 115–32.
  94. Marshall J B, Singh R, Demmy T L, Bickel J T, Everett E D. Mediastinal histoplasmosis presenting with esophageal involvement and dysphagia: case study. *Dysphagia* 1995; 10: 53–58.
  95. Sandkovsky U, Ali K F, VanSchooneveld T C, Radio S J, Swindells S. Disseminated histoplasmosis presenting as esophageal ulceration in an HIV-infected man. *Infect Dis Clin Pract* 2013; 21: 383–5.
  96. Norder Grusell E, Dahlén G, Ruth M *et al*. Bacterial flora of the human oral cavity, and the upper and lower esophagus. *Dis Esophagus* 2013; 26: 84–90.



97. Yang L, Lu X, Nossa C W, Francois F, Peek R M, Pei Z. Inflammation and intestinal metaplasia of the distal esophagus are associated with alterations in the microbiome. *Gastroenterology* 2009; 137: 588–97.
98. Walsh T J, Belitsos N J, Hamilton S R. Bacterial esophagitis in immunocompromised patients. *Arch Intern Med* 1986; 146: 1345–8.
99. Radhi J M, Schweiger F. Bacterial oesophagitis in an immunocompromised patient. *Postgrad Med J* 1994; 70: 233–4.
100. Shin J A, Lee Y B, Yoon I C, Jeong H J, Kwon T, Lee H S. Bacterial ulcerative esophagitis in an immunocompetent patient. *Case Rep Gastroenterol* 2017; 11: 162–7.
101. Jain S K, Jain S, Jain M, Yaduvanshi A. Esophageal tuberculosis: is it so rare? Report of 12 cases and review of the literature. *Am J Gastroenterol*. 2002; 97: 287–91.
102. Gomes J, Antunes A, Carvalho A, Duarte R. Dysphagia as a manifestation of esophageal tuberculosis: a report of two cases. *J Med Case Rep* 2011; 5: 447.
103. Welzel T M, Kawan T, Bohle W, Richter G M, Bosse A, Zoller W G. An unusual cause of dysphagia: esophageal tuberculosis. *J Gastrointest Liver Dis* 2010; 19: 321–4.
104. El-Serag H B, Johnston D E. Mycobacterium avium complex esophagitis. *Am J Gastroenterol* 1997; 92: 1561–3.
105. Wilcox C M. Esophageal disease in the acquired immunodeficiency syndrome: etiology, diagnosis, and management. *Am J Med* 1992; 92: 412–21.
106. Rabeneck L, Popovic M, Gartner S *et al*. Acute HIV infection presenting with painful swallowing and esophageal ulcers. *JAMA* 1990; 263: 2318.
107. Nishioka K, Fujishima K, Kobayashi H, Mizuno Y, Okuma Y. An extremely unusual presentation of varicella zoster viral infection of cranial nerves mimicking Garcin syndrome. *Clin Neurol Neurosurg* 2006; 108: 772–4.
108. Paliwal M, Prasanna K S, Saraswat V A, Misra A, Krishnani N, Ghoshal U C. Varicella zoster cranial polyneuropathy presenting with dysphagia, esophagitis and gastroparesis. *J Neurogastroenterol Motil* 2011; 17: 192–4.
109. Moretti F, Uberti-Foppa C, Quiros-Roldan E, Fanti L, Lillo F, Lazzarin A. Oesophagobronchial fistula caused by varicella zoster virus in a patient with AIDS: a unique case. *J Clin Pathol* 2002; 55: 397–8.
110. Cohen J I. Herpes zoster. *N Engl J Med* 2013; 369: 255–63.
111. Kitchen V S, Helbert M, Francis N D *et al*. Epstein-Barr virus associated oesophageal ulcers in AIDS. *Gut* 1990; 31: 1223–5.
